# Supplementary material
Source: Springer Nature journal article supplement (https://www.springermedizin.de/resource/supplementary/12916_2006_85_MOESM1_ESM.pdf/9599136)

# FEMALES

# MALES

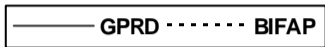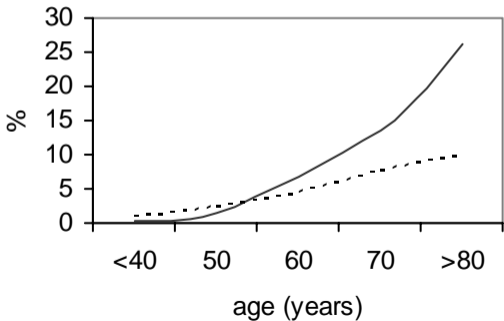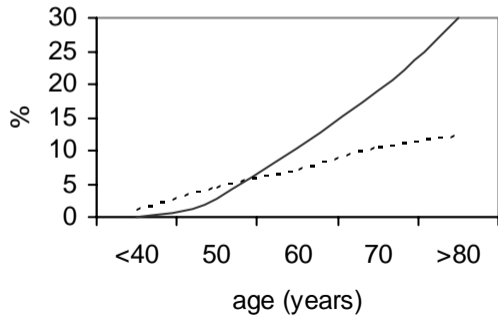

Supplement: MOESM1 [file 9599136]
